# Supplementary figures and images for: A Retrospective Study of the Efficacy and Safety of Naldemedine for Treatment of Opioid-Induced Constipation in Patients with Hepatobiliary Pancreatic Cancer
Source: MDPI journal article supplement (doi:10.3390/medicina59030492), 2023-03-02

## Supplementary Figure 1

Study period: June 2017 to August 2019

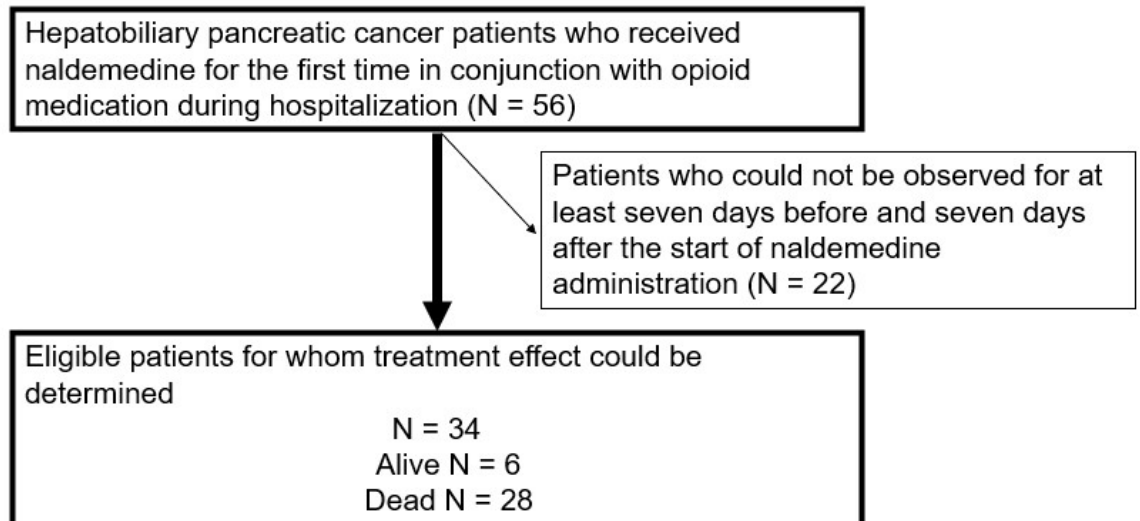

Data cutoff date  
September 30, 2019

Supplement: s1 [file s1]
